# Supplementary material
Source: publisher site journal article supplement (https://www.dovepress.com/article/384936)
Supplement: Supplementary file 1 [file get_supplementary_file.php]

**Table S1 Structure of the CHF-PROM**

| <b>Domains</b>              | <b>Subdomains</b>   | <b>Items</b>                                           |
|-----------------------------|---------------------|--------------------------------------------------------|
| <b>Physical domain</b>      | Somatic symptoms    | PHD1-, PHD2-, PHD3-, PHD4-, PHD5-, PHD6-, PHD7-, PHD8- |
|                             | Appetite symptoms   | PHD9-, PHD10-, PHD11-, PHD12-                          |
|                             | Independence        | PHD13, PHD14, PHD15, PHD16                             |
| <b>Psychological domain</b> | anxiety             | PSD1-, PSD2-, PSD3-, PSD4-, PSD5-, PSD6-, PSD7-, PSD8- |
|                             | Depression          | PSD9-, PSD10-, PSD11-, PSD12-, PSD13-, PSD14-          |
|                             | Fear                | PSD15-, PSD16-, PSD17-                                 |
|                             | Paranoia            | PSD18-, PSD19-, PSD20-, PSD21-                         |
| <b>Social domain</b>        | Social support      | SOD1, SOD2, SOD3, SOD4, SOD5                           |
|                             | Support utilization | SOD6, SOD7, SOD8                                       |
| <b>Therapeutic domain</b>   | Compliance          | TRE1, TRE2                                             |
|                             | Satisfaction        | TRE3, TRE4, TRE5, TRE6, TRE7, TRE8, TRE9, TRE10        |
|                             | Side effects        | TRE11, TRE12-                                          |

CHF-PROM, chronic heart failure - patient reported outcome measures; PHD, physical domain; PSD, psychological domain; SOD, social domain; TRE, therapeutic domain.

**Table S2 Comparison the baseline characteristics between completed the follow-up group and lost to follow-up group**

|                                           | Completed the follow-up | Lost to follow-up | <i>P</i> |
|-------------------------------------------|-------------------------|-------------------|----------|
|                                           | n=315                   | n=93              |          |
| <b>Age</b>                                | 66.1±15.0               | 68.7±12.2         | 0.148    |
| <b>Women</b>                              | 138(43.8%)              | 40(43.0%)         | 0.963    |
| <b>Body Mass Index (kg/m<sup>2</sup>)</b> | 24.2±4.1                | 23.6±3.8          | 0.243    |
| <b>Heart rate</b>                         | 77.9±15.7               | 80.2±17.9         | 0.318    |
| <b>Systolic pressure (mmHg)</b>           | 127.6±19.6              | 124.9±23.2        | 0.345    |
| <b>Diastolic pressure (mmHg)</b>          | 77.4±12.6               | 73.7±16.5         | 0.050    |
| <b>Marital state</b>                      |                         |                   | 0.702    |
| Single                                    | 6(1.9%)                 | 2(2.2%)           |          |
| Married                                   | 259(82.2%)              | 73(78.5%)         |          |
| Divorced                                  | 1(0.3%)                 | 0                 |          |
| Widowed                                   | 49 (15.6%)              | 18(19.4%)         |          |
| <b>Education</b>                          |                         |                   | 0.095    |
| Illiteracy                                | 27(8.6%)                | 8(8.6%)           |          |
| Low level                                 | 195(61.9%)              | 67(72.0%)         |          |
| Secondary school and high level           | 93(29.5%)               | 18(19.4%)         |          |
| <b>Occupation</b>                         |                         |                   | 0.881    |
| Nonmanual workers                         | 98(31.1%)               | 28(30.1%)         |          |
| Manual workers                            | 217(68.9%)              | 65(69.9%)         |          |
| <b>Income</b>                             |                         |                   | 0.272    |
| Low                                       | 132(41.9%)              | 48(51.6%)         |          |
| Medium                                    | 178(56.5%)              | 43(46.2%)         |          |
| High                                      | 5(1.6%)                 | 2(2.2%)           |          |
| <b>Health care</b>                        |                         |                   | 0.476    |
| City health insurance                     | 214(67.9%)              | 57(61.3%)         |          |
| Rural health insurance                    | 98(31.1%)               | 36(38.7%)         |          |
| Self-paying                               | 3(1.0%)                 | 0                 |          |
| <b>NYHA</b>                               |                         |                   | 0.210    |
| II                                        | 54(17.1%)               | 11(11.8%)         |          |
| III                                       | 145(46.0%)              | 37(39.8%)         |          |
| IV                                        | 116(36.8%)              | 45(48.4%)         |          |
| <b>Complications</b>                      |                         |                   |          |
| Coronary heart disease                    | 156(49.5%)              | 46(49.5%)         | 0.960    |
| Hypertension                              | 190(60.3%)              | 54(58.1%)         | 0.787    |
| Atrial fibrillation                       | 117(37.1%)              | 46(49.5%)         | 0.060    |
| Valvular heart disease                    | 77(24.4%)               | 26(28.0%)         | 0.551    |
| Hyperlipidemia                            | 99(31.4%)               | 22(23.7%)         | 0.219    |
| Diabetes                                  | 111(35.2%)              | 22(23.7%)         | 0.076    |
| COPD                                      | 73(23.2%)               | 28(30.1%)         | 0.268    |

|                                | <b>Completed the follow-up</b> | <b>Lost to follow-up</b> | <b>P</b> |
|--------------------------------|--------------------------------|--------------------------|----------|
| Chronic renal insufficiency    | 83(26.3%)                      | 34(36.6%)                | 0.109    |
| Cancers                        | 24(7.6%)                       | 11(11.8%)                | 0.321    |
| Central nervous system disease | 69(21.9%)                      | 26(28.0%)                | 0.277    |
| <b>LVEF (%)</b>                | 43.8±14.3                      | 41.8±13.6                | 0.330    |
| <b>Drugs</b>                   |                                |                          |          |
| Nitrates                       | 145(46.0%)                     | 40(43.0%)                | 0.693    |
| Diuretics                      | 223(70.8%)                     | 64(68.8%)                | 0.707    |
| Digoxin                        | 77(24.4%)                      | 28(30.1%)                | 0.356    |
| Beta-blockers                  | 150(47.6%)                     | 34(36.6%)                | 0.125    |
| ACEI/ARBs                      | 154(48.9%)                     | 25(26.9%)                | 0.002*   |
| Aldosterone antagonists        | 209(66.3%)                     | 48(51.6%)                | 0.029*   |

ACEI, angiotensin converting enzyme inhibitors; ARB, angiotensin receptor antagonist; COPD,

Chronic obstructive pulmonary disease; LVEF, left ventricular ejection fraction; NYHA, New York

Heart Association functional class.

**Table S3 Comparison of the fitting index in growth mixture models for overall scores**

|                                  | LL               | AIC              | BIC              | aBIC             | Entropy      | LMR-test     | BLRT             | Probability of groups   |
|----------------------------------|------------------|------------------|------------------|------------------|--------------|--------------|------------------|-------------------------|
| <b>Linear models</b>             |                  |                  |                  |                  |              |              |                  |                         |
| <b>2C</b>                        | -5861.640        | 11755.281        | 11813.777        | 11763.039        | 0.979        | 0.217        | <0.001           | 0.024/0.976             |
| <b>3C</b>                        | -5848.273        | 11730.546        | 11792.698        | 11738.789        | 0.869        | 0.186        | <0.001           | 0.168/0.014/0.818       |
| <b>4C</b>                        | -5840.027        | 11718.054        | 11787.517        | 11727.267        | 0.894        | <0.001       | 0.013            | 0.164/0.014/0.010/0.811 |
| <b>Quadratic function models</b> |                  |                  |                  |                  |              |              |                  |                         |
| <b>2C</b>                        | -5806.983        | 11655.965        | 11732.741        | 11666.148        | 0.911        | 0.227        | <0.001           | 0.126/0.874             |
| <b>3C</b>                        | -5788.702        | 11627.404        | 11718.803        | 11639.526        | 0.935        | 0.005        | <0.001           | 0.129/0.014/0.857       |
| <b>4C</b>                        | -5775.746        | 11609.491        | 11715.515        | 11623.553        | 0.900        | 0.312        | <0.001           | 0.063/0.119/0.014/0.804 |
| <b>Undefined curve models</b>    |                  |                  |                  |                  |              |              |                  |                         |
| <b>2C</b>                        | <b>-5838.005</b> | <b>11706.011</b> | <b>11760.851</b> | <b>11713.284</b> | <b>0.841</b> | <b>0.044</b> | <b>&lt;0.001</b> | <b>0.140/0.860</b>      |
| <b>3C</b>                        | -5820.568        | 11677.137        | 11742.945        | 11685.865        | 0.878        | 0.005        | <0.001           | 0.014/0.808/0.178       |
| <b>4C</b>                        | -5814.045        | 11670.089        | 11746.865        | 11680.272        | 0.794        | 0.517        | 0.0202           | 0.014/0.122/0.720/0.143 |

AIC, akaike information criterion; BIC, bayesian information criterion; aBIC, adjusted BIC; BLRT, bootstrapped likelihood ratio test; LL, log-likelihood; LMR-test, lo-mendell-rubin test.

**Table S4 Comparison of the fitting index in growth mixture models for physical scores**

|                                  | LL               | AIC             | BIC             | aBIC            | Entropy      | LMR-test     | BLRT             | Probability of groups         |
|----------------------------------|------------------|-----------------|-----------------|-----------------|--------------|--------------|------------------|-------------------------------|
| <b>Linear models</b>             |                  |                 |                 |                 |              |              |                  |                               |
| <b>2C</b>                        | -4941.535        | 9909.070        | 9956.598        | 9915.374        | 0.794        | 0.162        | <0.001           | 0.804/0.196                   |
| <b>3C</b>                        | -4916.685        | 9871.369        | 9940.833        | 9880.582        | 0.825        | 0.130        | <0.001           | 0.080/0.622/<br>0.297         |
| <b>4C</b>                        | -4913.855        | 9865.710        | 9935.173        | 9874.923        | 0.815        | 0.105        | <0.001           | 0.073/0.238/<br>0.587/0.101   |
| <b>Quadratic function models</b> |                  |                 |                 |                 |              |              |                  |                               |
| <b>2C</b>                        | -4827.362        | 9690.724        | 9756.532        | 9699.452        | 0.800        | 0.424        | <0.001           | 0.241/0.759                   |
| <b>3C</b>                        | <b>-4791.933</b> | <b>9627.866</b> | <b>9708.298</b> | <b>9638.534</b> | <b>0.921</b> | <b>0.001</b> | <b>&lt;0.001</b> | <b>0.052/0.294/<br/>0.654</b> |
| <b>4C</b>                        | -4782.170        | 9616.340        | 9711.396        | 9628.948        | 0.889        | 0.616        | <0.001           | 0.594/0.203/<br>0.045/0.157   |
| <b>Undefined curve models</b>    |                  |                 |                 |                 |              |              |                  |                               |
| <b>2C</b>                        | -4801.283        | 9636.566        | 9698.718        | 9644.809        | 0.786        | 0.481        | <0.001           | 0.199/0.801                   |
| <b>3C</b>                        | -4779.541        | 9599.081        | 9672.201        | 9608.780        | 0.894        | 0.122        | <0.001           | 0.056/0.301/<br>0.643         |
| <b>4C</b>                        | -4766.393        | 9578.786        | 9662.873        | 9589.938        | 0.910        | 0.013        | <0.001           | 0.259/0.598/<br>0.031/0.112   |

AIC, akaike information criterion; BIC, bayesian information criterion; aBIC, adjusted BIC; BLRT, bootstrapped likelihood ratio test; LL, log-likelihood; LMR-test, lo-mendell-rubin test.

**Table S5 Comparison of the fitting index in growth mixture models for psychological scores**

|                                  | LL               | AIC                  | BIC                  | aBIC                 | Entropy      | LMR-test     | BLRT             | Probability of groups       |
|----------------------------------|------------------|----------------------|----------------------|----------------------|--------------|--------------|------------------|-----------------------------|
| <b>Linear models</b>             |                  |                      |                      |                      |              |              |                  |                             |
| <b>2C</b>                        | -4578.659        | 9183.<br>318         | 9230.<br>755         | 9189.<br>531         | 0.991        | 0.008        | <0.001           | 0.912/0.088                 |
| <b>3C</b>                        | -4512.695        | 9057.<br>389         | 9115.<br>773         | 9065.<br>036         | 0.995        | 0.009        | <0.001           | 0.873/0.085/<br>0.042       |
| <b>4C</b>                        | -4481.688        | 9001.<br>376         | 9070.<br>706         | 9010.<br>457         | 0.992        | 0.050        | <0.001           | 0.035/0.870/<br>0.056/0.039 |
| <b>Quadratic function models</b> |                  |                      |                      |                      |              |              |                  |                             |
| <b>2C</b>                        | -4502.640        | 9041.<br>280         | 9106.<br>962         | 9049.<br>883         | 0.991        | 0.012        | <0.001           | 0.085/0.915                 |
| <b>3C</b>                        | -4451.600        | 8947.<br>199         | 9027.<br>477         | 8957.<br>714         | 0.992        | 0.307        | <0.001           | 0.894/0.067/<br>0.039       |
| <b>4C</b>                        | -4387.291        | 8826.<br>582         | 8921.<br>455         | 8839.<br>008         | 0.989        | 0.368        | <0.001           | 0.039/0.049/<br>0.056/0.856 |
| <b>Undefined curve models</b>    |                  |                      |                      |                      |              |              |                  |                             |
| <b>2C</b>                        | <b>-4470.737</b> | <b>8975.<br/>475</b> | <b>9037.<br/>507</b> | <b>8983.<br/>599</b> | <b>0.992</b> | <b>0.009</b> | <b>&lt;0.001</b> | <b>0.085/0.915</b>          |
| <b>3C</b>                        | -4420.278        | 8880.<br>555         | 8953.<br>535         | 8890.<br>114         | 0.993        | 0.118        | <0.001           | 0.039/0.894<br>/0.067       |
| <b>4C</b>                        | -4396.462        | 8838.<br>924         | 8922.<br>851         | 8849.<br>917         | 0.970        | 0.473        | <0.001           | 0.039/0.049<br>/0.056/0.856 |

AIC, akaike information criterion; BIC, bayesian information criterion; aBIC, adjusted BIC; BLRT, bootstrapped likelihood ratio test; LL, log-likelihood; LMR-test, lo-mendell-rubin test.

**Table S6 Comparison of the fitting index in growth mixture models for therapeutic scores**

|                                  | LL        | AIC      | BIC      | aBIC     | Entropy | LMR-test | BLRT   | Probability of groups       |
|----------------------------------|-----------|----------|----------|----------|---------|----------|--------|-----------------------------|
| <b>Linear models</b>             |           |          |          |          |         |          |        |                             |
| <b>2C</b>                        | -4301.234 | 8628.467 | 8675.995 | 8634.771 | 0.982   | 0.001    | <0.001 | 0.514/0.416                 |
| <b>3C</b>                        | -4260.911 | 8553.821 | 8612.317 | 8561.580 | 0.957   | 0.035    | <0.001 | 0.077/0.507/<br>0.416       |
| <b>4C</b>                        | -4273.818 | 8585.636 | 8655.100 | 8594.850 | 0.916   | 0.211    | <0.001 | 0.343/0.112/<br>0.504/0.042 |
| <b>Quadratic function models</b> |           |          |          |          |         |          |        |                             |
| <b>2C</b>                        | -4264.104 | 8564.209 | 8630.017 | 8572.937 | 0.979   | <0.001   | <0.001 | 0.517/0.483                 |
| <b>3C</b>                        | -4224.642 | 8493.284 | 8573.716 | 8503.952 | 0.959   | 0.021    | <0.001 | 0.416/0.507/<br>0.077       |
| <b>4C</b>                        | -4200.295 | 8452.590 | 8547.645 | 8465.197 | 0.968   | 0.490    | <0.001 | 0.406/0.490/<br>0.045/0.059 |
| <b>Undefined curve models</b>    |           |          |          |          |         |          |        |                             |
| <b>2C</b>                        | -4231.548 | 8489.096 | 8536.624 | 8495.400 | 0.988   | 0.001    | <0.001 | 0.346/0.654                 |
| <b>3C</b>                        | -4186.728 | 8405.456 | 8463.952 | 8413.214 | 0.994   | <0.001   | <0.001 | 0.654/0.318/<br>0.028       |
| <b>4C</b>                        | -4162.794 | 8363.587 | 8433.051 | 8372.800 | 0.982   | 0.216    | <0.001 | 0.042/0.283/<br>0.647/0.028 |

AIC, akaike information criterion; BIC, bayesian information criterion; aBIC, adjusted BIC; BLRT, bootstrapped likelihood ratio test; LL, log-likelihood; LMR-test, lo-mendell-rubin test.
